# Supplementary material for: Evolution of proteomes: fundamental signatures and global trends in amino acid compositions
Source: PubMed Central journal article supplement (PMC1764020; doi:10.1186/1471-2164-7-307), 2006-12-05

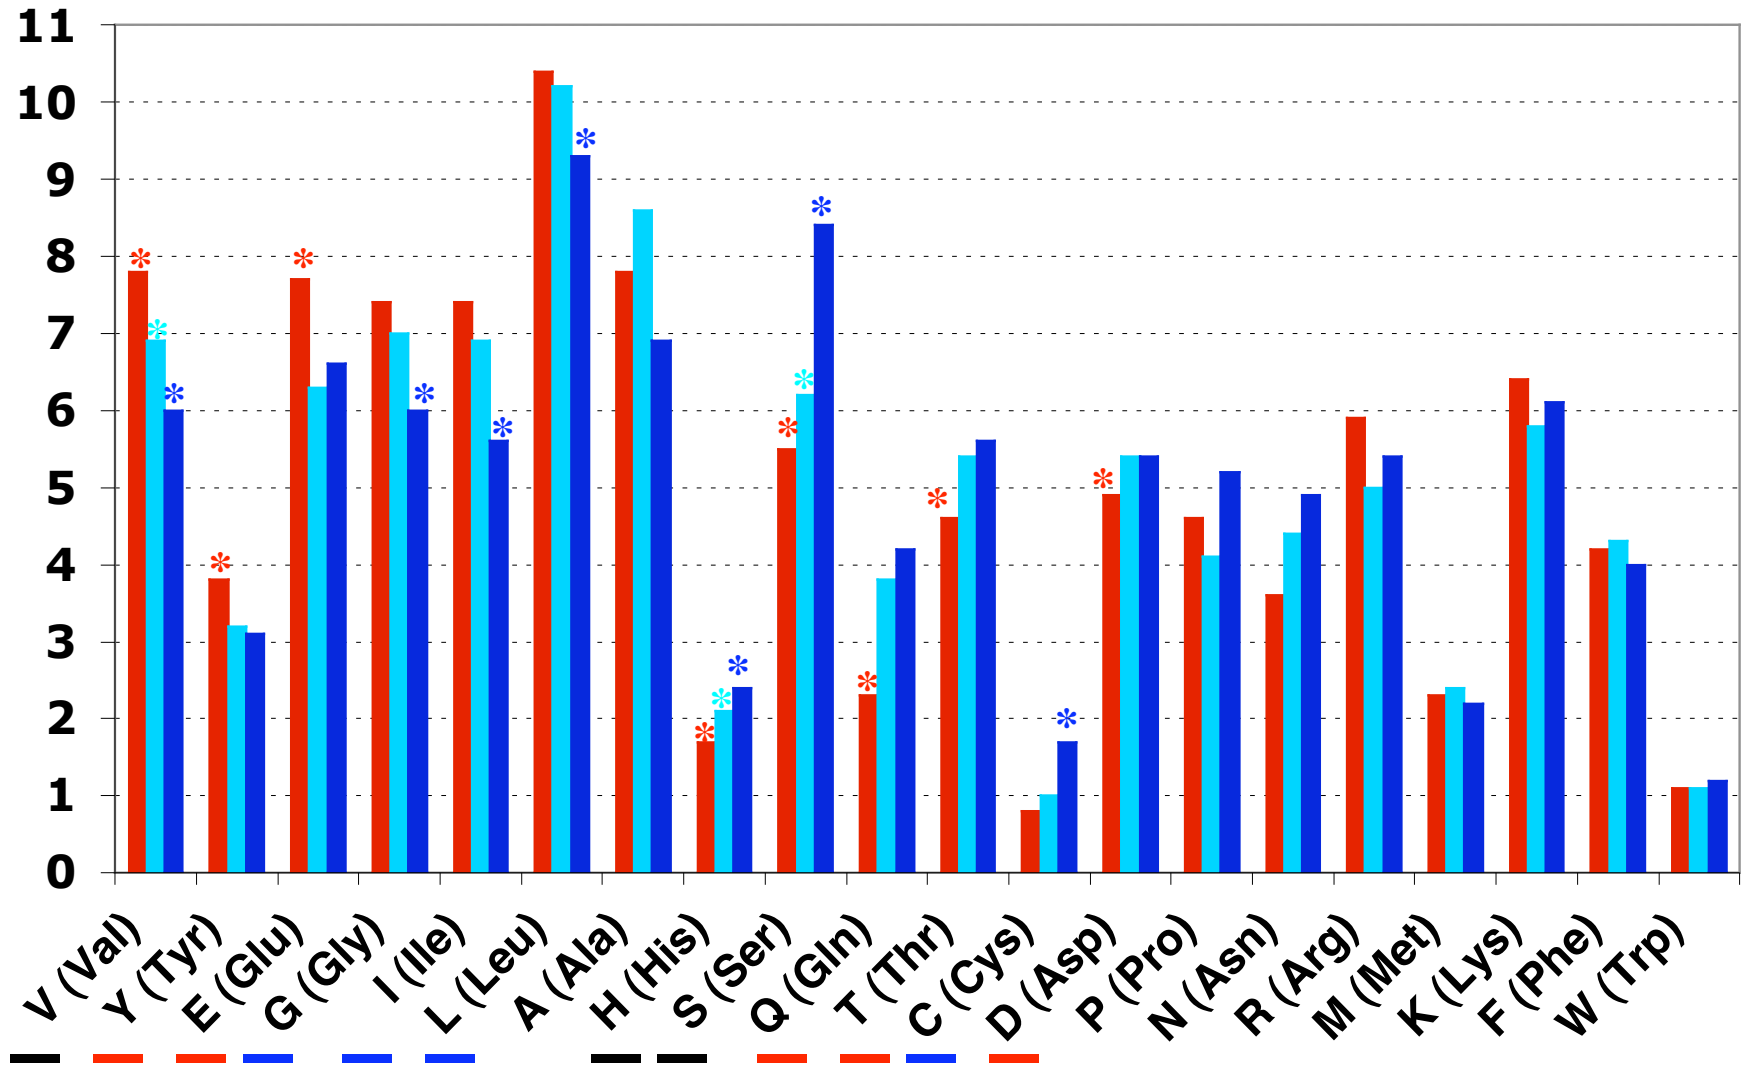

Supplement: 1471-2164-7-307-S3.pdf [file 1471-2164-7-307-S3.pdf]
